# Supplementary material
Source: MDPI journal article supplement (https://www.mdpi.com/1996-1073/8/7/6898)
Supplement: s1 [file s1]

## Supplementary Materials

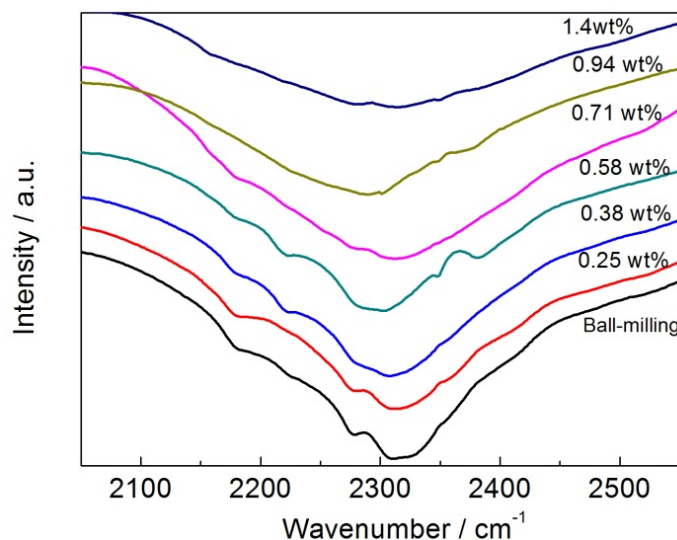

**Figure S1.** FT-IR spectra of B–H stretching vibrations from  $T_2$  ( $2\text{Mg}(\text{NH}_2)_2\text{--}3\text{LiH--LiBH}_4$ ) samples collected at 460 K at different degree of dehydrogenation: 0 wt%, ball-milling stage; 0.25 wt%; 0.38 wt%; 0.58 wt%; 0.71 wt%; 0.94 wt%; 1.4 wt%.

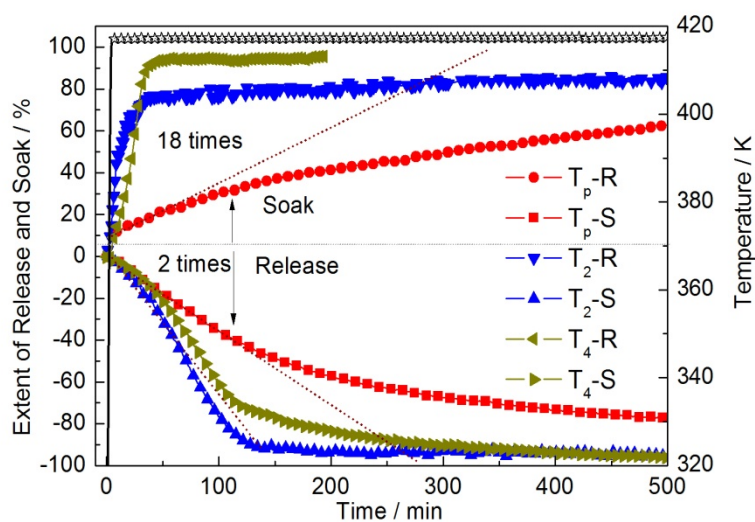

**Figure S2.** Isothermal hydrogen desorption and sorption of the  $2\text{Mg}(\text{NH}_2)_2\text{--}3\text{LiH}$  composite ( $T_p$ ),  $2\text{Mg}(\text{NH}_2)_2\text{--}3\text{LiH--LiBH}_4$  composite ( $T_2$ ) and  $2\text{Mg}(\text{NH}_2)_2\text{--}3\text{LiH--}1/3\text{LiBH}_4$  composite ( $T_4$ ) at 416 K under the pressure of 0.01 and 6 MPa, respectively.
